# Supplementary material for: Molecular mechanism and potential target indication of TAK-931, a novel CDC7-selective inhibitor
Source: PubMed Central journal article supplement — Sci Adv. 2019 May 22;5(5):eaav3660. doi: 10.1126/sciadv.aav3660 (PMC6531005; doi:10.1126/sciadv.aav3660), 2019-05-22
Supplement: aav3660_SM.pdf [file aav3660_SM.pdf]

## Supplementary Materials for

### **Molecular mechanism and potential target indication of TAK-931, a novel CDC7-selective inhibitor**

Kenichi Iwai, Tadahiro Nambu, Ryo Dairiki, Momoko Otori, Jie Yu, Kristine Burke, Masamitsu Gotou, Yukiko Yamamoto, Shunsuke Ebara, Sachio Shibata, Ryosuke Hibino, Satoru Nishizawa, Tohru Miyazaki, Misaki Homma, Yuya Oguro, Takashi Imada, Nobuo Cho, Noriko Uchiyama, Akifumi Kogame, Toshiyuki Takeuchi, Osamu Kurasawa, Kazunori Yamanaka, Huifeng Niu, Akihiro Ohashi\*

\*Corresponding author. Email: aohashi@east.ncc.go.jp

Published 22 May 2019, *Sci. Adv.* **5**, eaav3660 (2019)  
DOI: 10.1126/sciadv.aav3660

#### **This PDF file includes:**

- Fig. S1. In vitro pharmacological profile of TAK-931.
- Fig. S2. Effect of TAK-931 on DNA replication, RS, and DDR.
- Fig. S3. Irreversible antiproliferative effects of TAK-931 and mitotic aberrations.
- Fig. S4. Large-scale in vitro cell panel studies of TAK-931.
- Fig. S5. Effect of KRAS mutation on TAK-931 antiproliferative activity, showing unique antiproliferative spectrum in cancer cells.
- Fig. S6. PK/PD/efficacy study of TAK-931 in tumor xenograft mouse model.
- Fig. S7. Antitumor efficacy of TAK-931 in tumor xenograft mouse model.
- Fig. S8. Pathway network between CDC7 and KRAS knockdown.
- Table S1. Phosphorylation sites modulated after 4 and 24 hours of TAK-931 treatment in COLO205 cells.
- Table S2. %T/C values of antitumor efficacy studies in colorectal, lung, ovarian, and pancreatic PDXs.

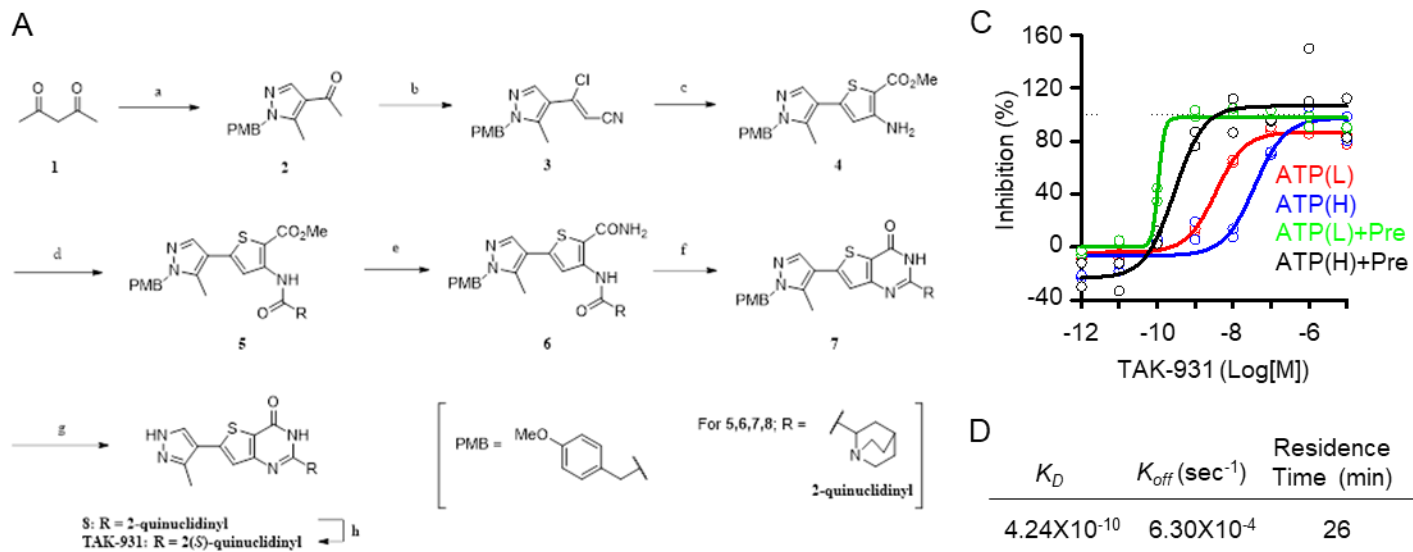

**B**

| Enzyme             | IC <sub>50</sub> (nM) | % inhibition at 1000nM |
|--------------------|-----------------------|------------------------|
| Cdc7/DBF4          | <0.3                  | N/A                    |
| DAPK3 (ZIPK)       | 160                   | 98.8                   |
| DAPK1              | 49.8                  | 96.1                   |
| CDK9/cyclin T1     | 36.9                  | 94.7                   |
| DMPK               | 44.2                  | 94.1                   |
| CDK8/cyclin C      | 101                   | 91.0                   |
| MAPK12 (p38 gamma) | 155                   | 85.1                   |
| STK17A (DRAK1)     | 115                   | 84.4                   |
| CLK4               | 99.0                  | 84.1                   |
| DYRK1A             | 148                   | 82.0                   |
| GSK3B (GSK3 beta)  | 338                   | 80.5                   |
| 307 kinase assays  | N.T.                  | < 80                   |

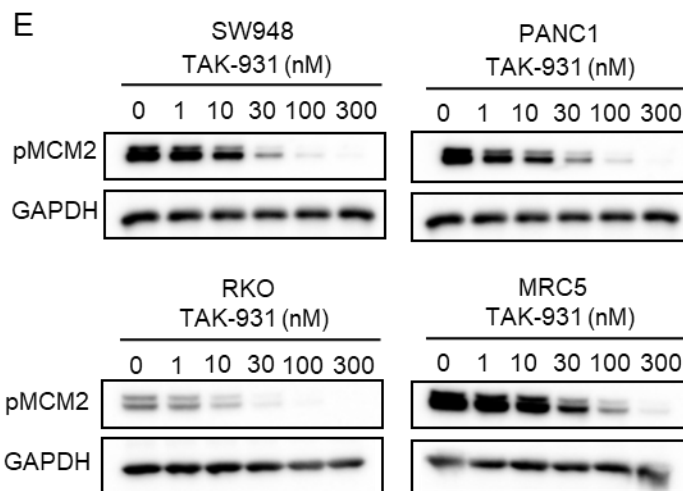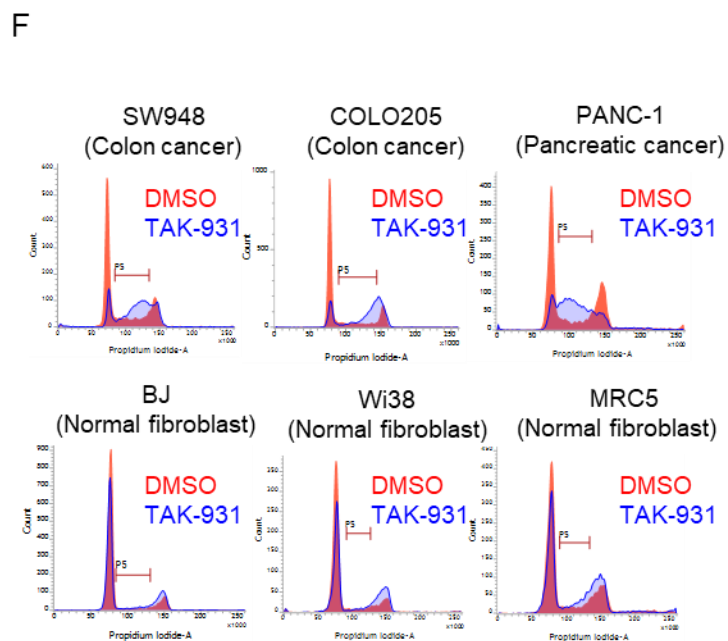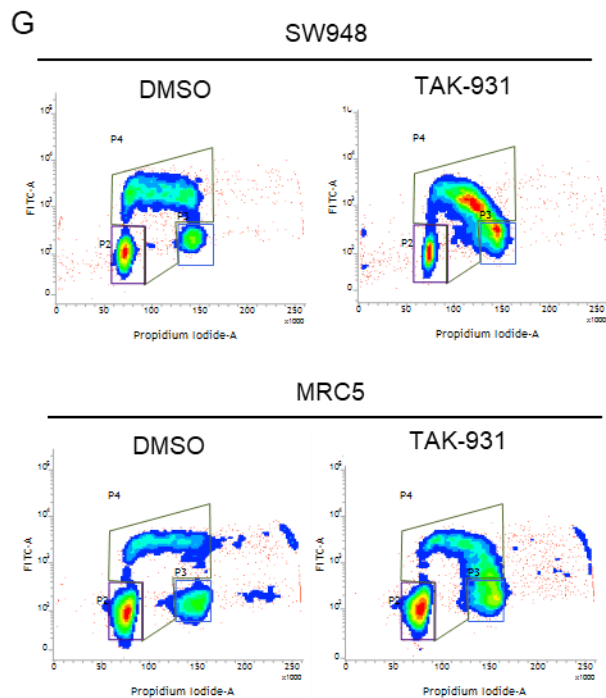

**Fig. S1. In vitro pharmacological profile of TAK-931.** (A) Reagents and conditions: (a) **1**, *N,N*-dimethylformamide dimethyl acetal, 80 °C, 1 h, then EtOH, Et<sub>3</sub>N, *p*-methoxybenzyl(PMB)-hydrazine hydrochloride, 0 °C to room temperature, overnight; (b) DMF, POCl<sub>3</sub>, 0 °C, 15 min, then **2**, 0 °C to 60 °C, 30 min, then hydroxylamine hydrochloride, 80 °C, 30 min; (c) methyl thioglycolate, NaH, DMF, 0 °C, 5 min, then **3**, 40 °C, 2 h; (d) 2-quinuclidinecarboxylic acid, SOCl<sub>2</sub>, 30 °C, 18 h, then **4**, DIEA, THF, room temperature to 60 °C, 75 min; (e) **5**, NaOH, MeOH, 60 °C, 1.5 h, then EDCI, HOBt, Et<sub>3</sub>N, NH<sub>4</sub>Cl, DMF, room temperature overnight; (f) **6**, NaOH, EtOH, 70 °C, 2 h; (g) **7**, TFA, anisole, 90 °C, 18 h; (h) **8**, Preparative HPLC (CHIRALPAK AD). (B) TAK-931 exhibits high-selectivity toward CDC7 kinase. The 318 kinases were used for enzymatic assay. The IC<sub>50</sub> values and % inhibition at 1,000 nM of TAK-931 are shown. (C) TAK-931 is an ATP-competitive CDC7 inhibitor with slow-binding kinetics. The red and blue lines indicate low (1 μM) and high (50 μM) ATP concentrations in the absence of preincubation (-), respectively. The green and black lines indicate low and high ATP concentrations in the presence of preincubation (+), respectively. (D) *K<sub>D</sub>* values of TAK-931. Kinetics analysis for TAK-931 was performed by surface plasmon resonance (SPR) in the Proteros reporter displacement assay. (E) Cellular activity of TAK-931. SW948, PANC-1, RKO, and MRC5 cells were treated with the indicated concentration of TAK-931 for 4 h. pMCM2 was used for the target engagement markers of CDC7 kinase. GAPDH was used for the loading controls. (F) Effect of TAK-931 on stalled S phase between cancer cell lines and untransformed fibroblasts. COLO205, SW948, and PANC-1 were used as representative cancer cell lines. BJ, WI38, and MRC5 were used as representative untransformed fibroblasts. The cells were treated with DMSO (control, red) and TAK-931 (300 nM, blue). The cells were collected 24 h after TAK-931 treatment and analyzed by flow cytometry. (G) Effect of

TAK-931 on BrdU incorporation in SW948 and MRC5 cells. The cells were treated with DMSO (red) or TAK-931 (300 nM, blue) for 24 h, and then BrdU was incorporated for 30 min. The cells were stained with PI and anti-BrdU antibody to be analyzed by flow cytometry.

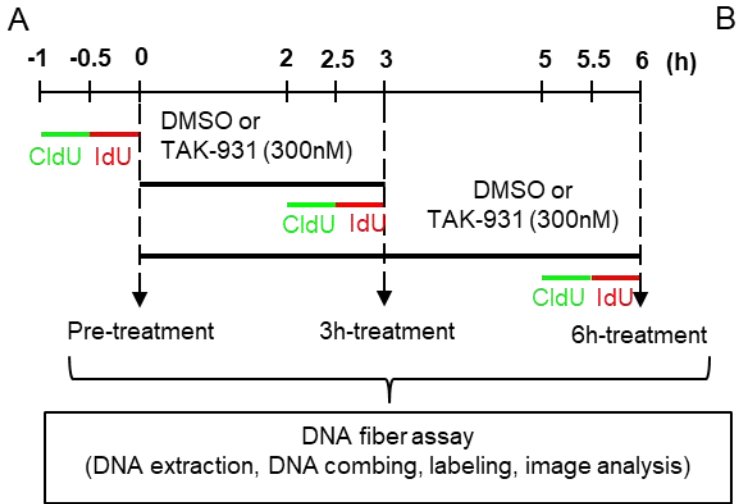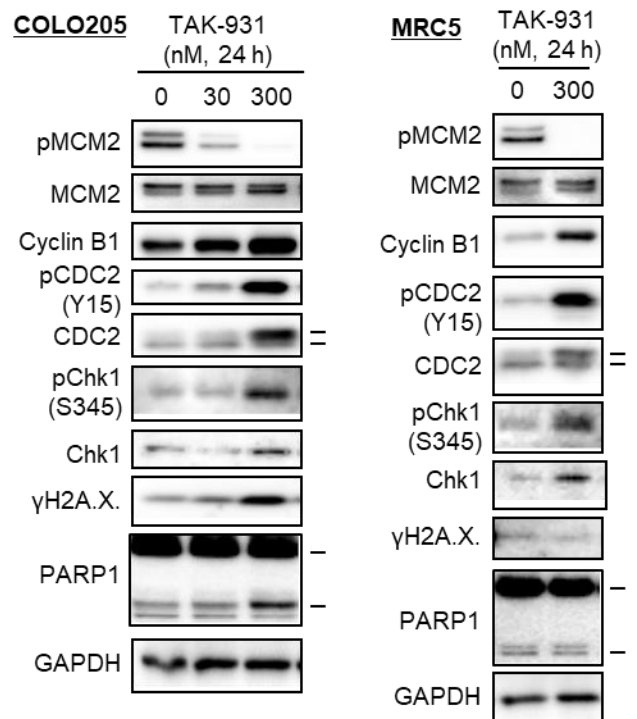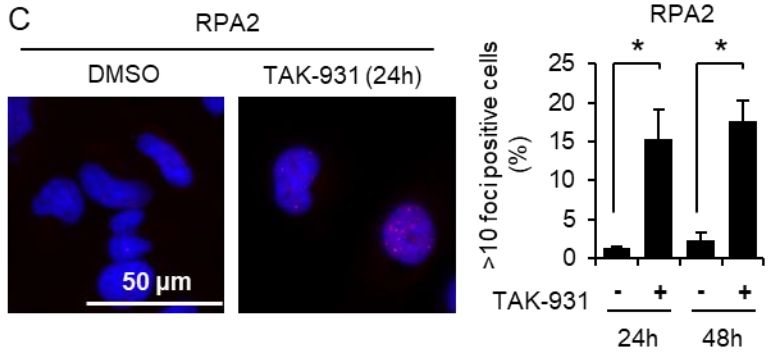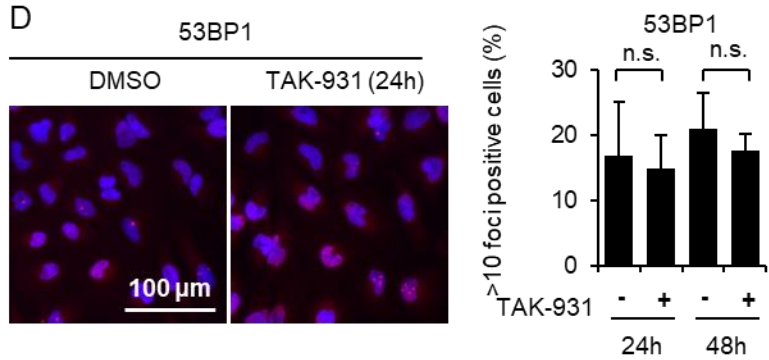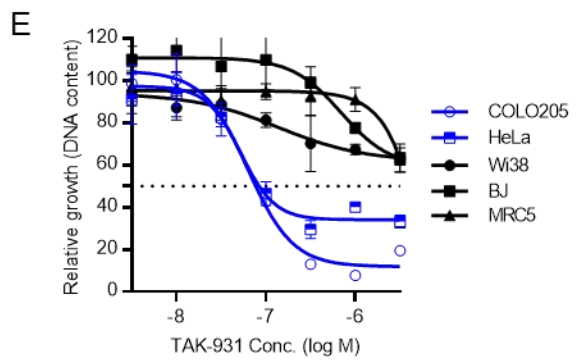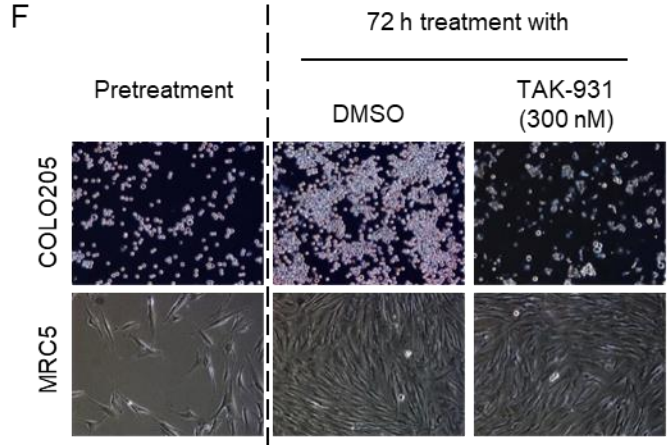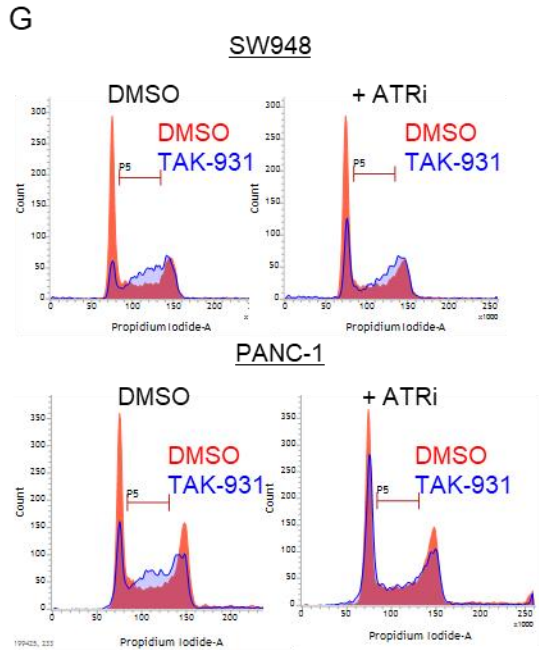

**Fig. S2. Effect of TAK-931 on DNA replication, RS, and DDR.** (A) Experimental schemes for DNA fiber assay. HeLa cells were treated with DMSO or TAK-931 (300 nM) for the indicated periods. The cells were sequentially incubated with CldU (green) and IdU (red) for 30 min for each. After CldU/IdU incorporation, the cells were collected for DNA fiber assay according to the manufacturer's procedures (GenomicVision). (B) Effects of TAK-931 on DDR, DNA damage checkpoint, and apoptosis in COLO205 (left) and MRC5 (right). The cells were treated with TAK-931 at the indicated concentrations for 24 h. Immunoblotting for pMCM2, MCM2, cyclin B1, pCDC2, pCHK1, CHK1,  $\gamma$ H2A.X, PARP1, and GAPDH was performed. Upper band of CDC2 indicates phosphorylated CDC2. Lower band of PARP1 indicates cleaved PARP1. MCM2 and GAPDH were used for loading controls. (C) (D) Effect of TAK-931 on RPA2 and 53BP1 foci formation. HeLa cells were treated with DMSO or TAK-931 (300 nM) for 24 h. Immunofluorescence for RPA2 (C) and 53BP1 (D) was performed. RPA2 and 53BP1 were used as markers for SSBs and DSBs, respectively. Red signals indicate RPA2 (C) or 53BP1 (D). Blue signals indicate DAPI (DNA). White bars indicate 50  $\mu$ m (left) or 100  $\mu$ m (right). Y-axis indicate % cells with >10 foci per nucleus. Data are presented as the mean  $\pm$  SD (n = 3). Differences were considered significant at  $p \leq 0.05$  (\*). (E) Effect of TAK-931 on antiproliferation in cancer cells (COLO205 and HeLa) and untransformed fibroblasts (WI38, BJ, and MRC5). The cells were treated with TAK-931 at the indicated concentrations for 72 h (n=3). Relative DNA contents were calculated relative to the DNA content of 0 nM TAK-931 treatment. (F) Representative pictures of COLO205 and MRC5 with or without TAK-931 treatment (300 nM, 72 h). (G) Effect of ATR on TAK-931-induced DNA replication stalling in SW948 (upper) and PANC-1 (lower). The cells were treated with DMSO (red, left), TAK-931

(300 nM, blue at left), ATR inhibitor (VE-821, 1  $\mu$ M, red at right), and combination (blue, right).

The cells were collected 24 h after TAK-931 treatment and analyzed by flow cytometry.

A

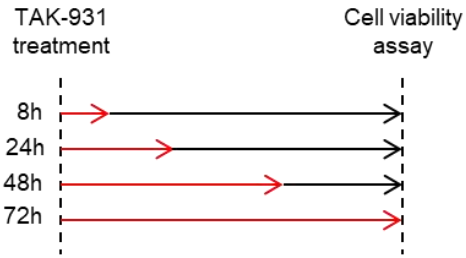

B

| Phosphorylation Status                                                            | Numbers                                                        |
|-----------------------------------------------------------------------------------|----------------------------------------------------------------|
| Quantified phosphorylation sites (class I, localization probability $\geq 0.75$ ) | 15,128<br>Ser (P): 85%, Thr (P): 14%, Tyr (P): 1%              |
| Quantified phosphoproteins                                                        | 4,426                                                          |
| Regulated phosphorylation sites                                                   | 52 in total<br>(4h: 2 sites, 24h: 51 sites, 1 site overlapped) |
| Regulated phosphoproteins                                                         | 43                                                             |

C

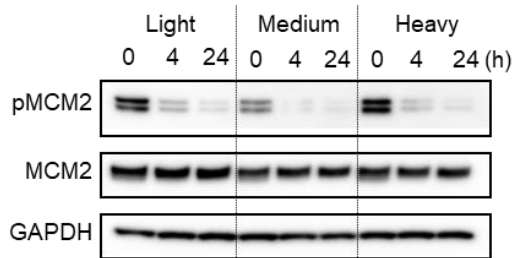

D COLO205 (4h) COLO205 (24h)  
(1 - 50 - 0) (51)

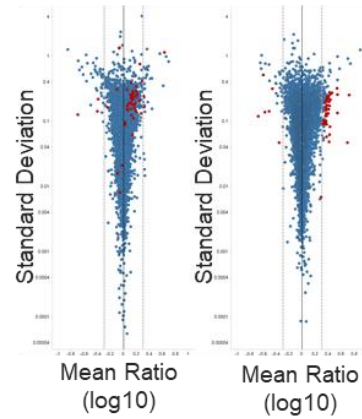

E

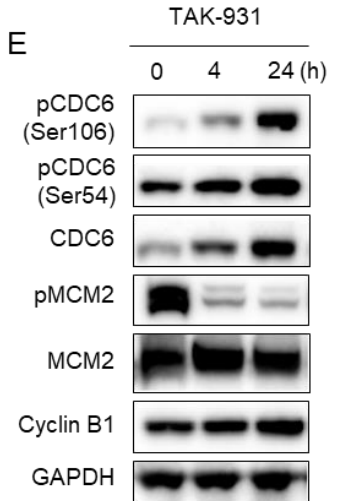

F

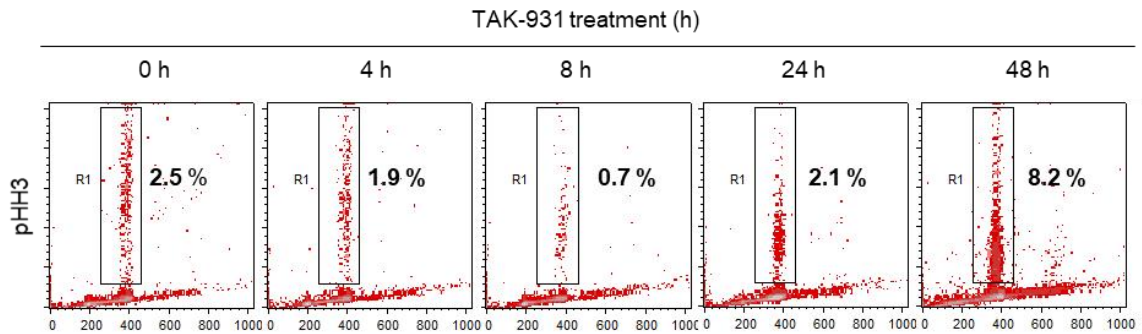

G

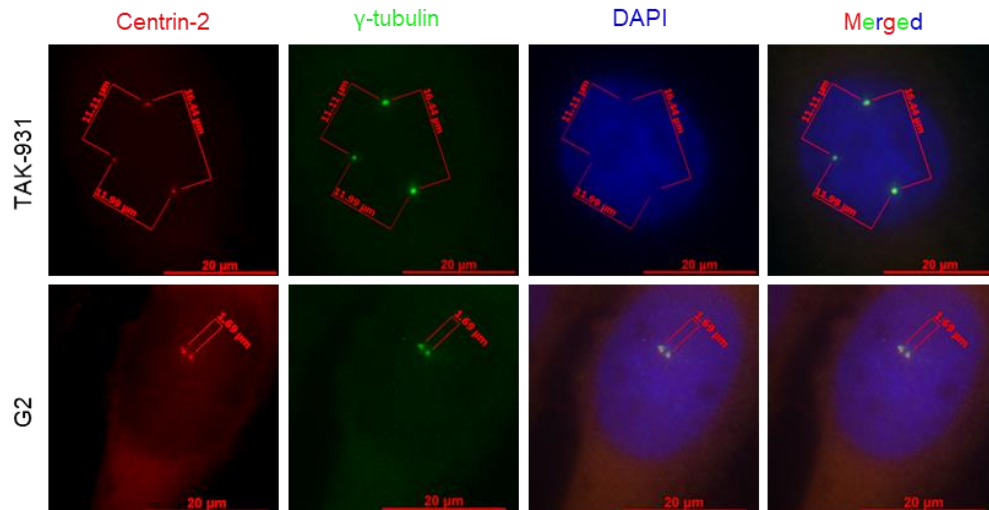



**Fig. S3. Irreversible antiproliferative effects of TAK-931 and mitotic aberrations.** (A) Experimental schemes to assess time-dependent antiproliferative activity of TAK-931. COLO205 cells were treated with TAK-931 at the indicated concentrations for 8, 24, 48, and 72 h (red arrows) and then cultured in TAK-931-free medium (black arrows). Cells were collected 72 h after treatment for cell viability analysis. (B) Summary of phosphorylation detected by phosphoproteomics analysis. (C) Immunoblotting analysis in SILAC-labeled COLO205 cells. COLO205 cells cultured in light, medium, or heavy SILAC media were treated with TAK-931 at 100 nM for 0, 4, or 24 h, then immunoblotting of pMCM2, MCM2, and GAPDH was performed; MCM2 and GAPDH were used as loading controls. (D) Volcano plot of quantified phosphorylation sites. The x-axis indicates the  $\log_{10}$ -scaled mean ratio of each phosphorylation site between TAK-931 and DMSO treatments. Plus and minus indicate upregulation and downregulation, respectively; dotted lines indicate 2-fold changes. The y-axis indicates the standard deviation. The volcano plots of 4 h (left) and 24 h (right) treatments are shown. The significantly changed phosphorylation sites at 24 h treatment are depicted in red. (E) Immunoblotting for pCDC6 (Ser-106, Ser-54), CDC6, cyclin B1, pMCM2 (Ser-40), MCM2, and GAPDH was performed. MCM2 and GAPDH were used for loading controls. COLO205 cells were treated with TAK-931 at 100 nM for 24 h. (F) Effect of TAK-931 on mitotic arrest in a time-dependent manner. HeLa cells were treated with TAK-931 at 300 nM for the indicated number of hours. pHH3 was used as a mitotic index. R1 indicates the % pHH3-positive cells. (G) Representative immunofluorescence images of centrosomal markers. Upper and lower images depict TAK-931-treated and G2 synchronous HeLa cells, respectively. Red: centrin-2, green:  $\gamma$ -tubulin, and blue: DAPI. The distances between centrosomes were measured by AxioVision.

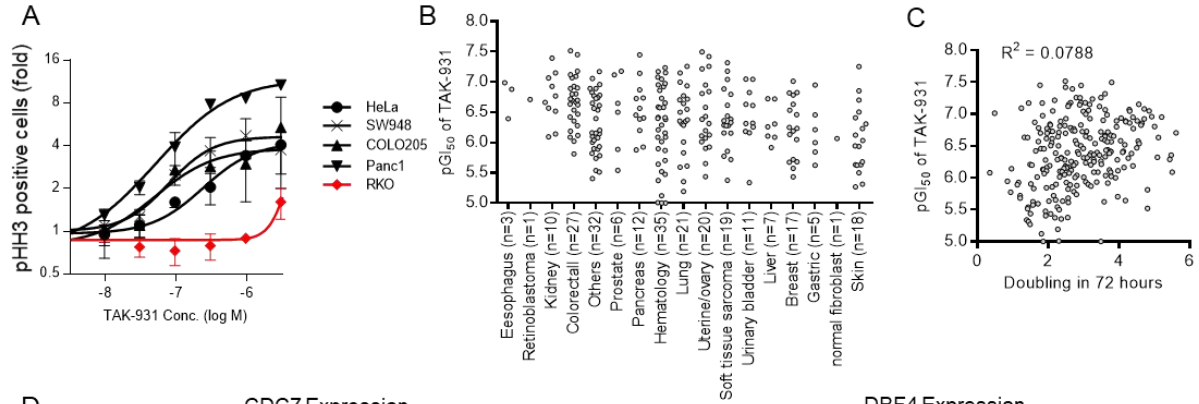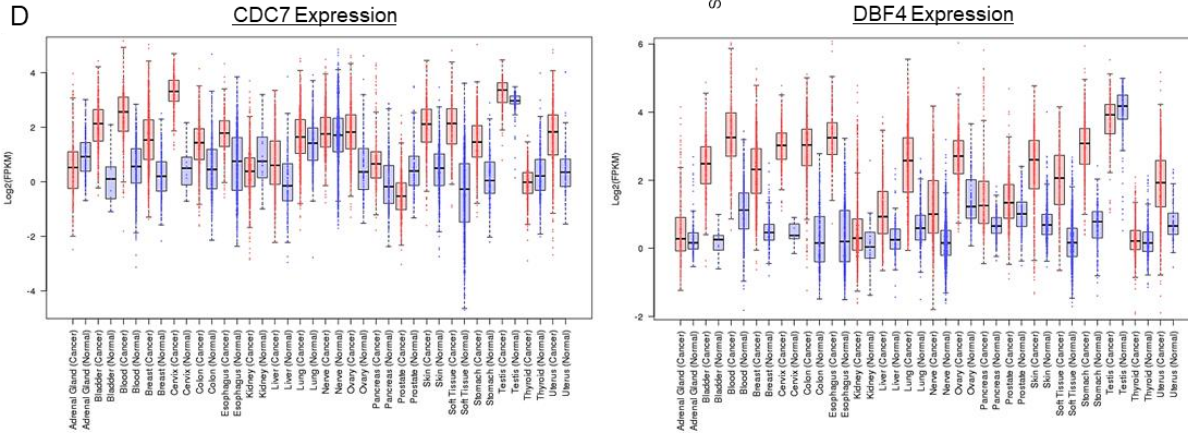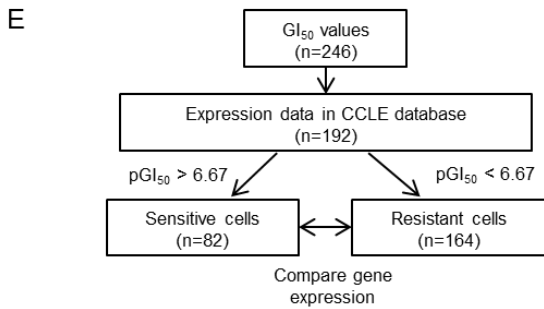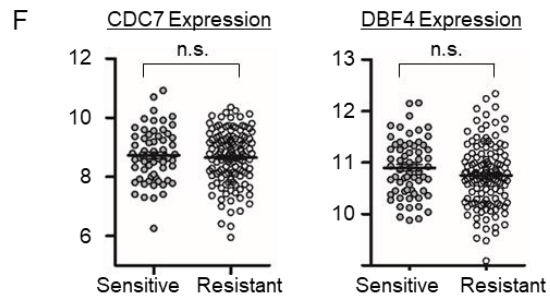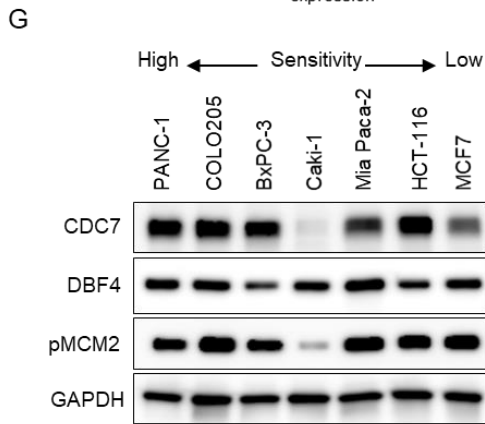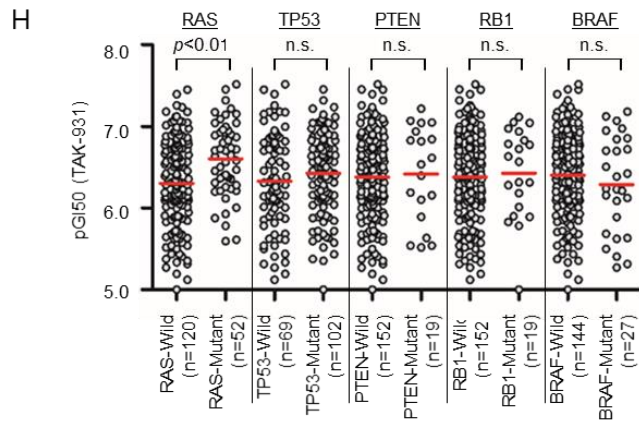

**Fig. S4. Large-scale in vitro cell panel studies of TAK-931.** (A) Fold increase curves of pHH3-positive cells by TAK-931 in the representative cancer cell lines are shown (HeLa, SW948, COLO205, PANC-1, and RKO cells). Cells were stained with fluorescently-labeled pHH3 antibody 72 h after TAK-931 treatment at the indicated concentrations. The fold-change in pHH3-positive cells was calculated relative to % pHH3 positive cells with 0 nM TAK-931 treatment. (B)  $GI_{50}$  values of TAK-931 in each pathological type of the 246 cancer cell lines. (C) No significant correlation was observed between TAK-931 sensitivity and the doubling-speed in the 246 cancer cell lines. (D) Expression of CDC7 and DBF4 in normal and cancer tissues. The mRNA expressions of CDC7 (left) and DBF4 (right) in normal and cancer tissues are shown. The databases of Genotype-Tissue Expression (GTEx, normal tissue), International Cancer Genome Consortium (ICGC, cancer tissue), and the Cancer Genome Atlas (TCGA, cancer tissue) were used. Red and blue indicate cancer and normal tissues, respectively. (E) Experimental schemes to evaluate the correlation between TAK-931 sensitivity and CDC7/DBF4 expression. The expression data in the Cancer Cell Line Encyclopedia (CCLE) database were used. A total of 192 of 246 cell lines, for which expression data were available in the CCLE database, were divided into sensitive ( $pGI_{50} > 6.67$ ) and resistant ( $pGI_{50} < 6.67$ ) cell line groups, and the expression levels of CDC7/DBF4 were compared. (F) Correlation of TAK-931 with CDC7/DBF4 expression. Dot plots of CDC7 (left) or DBF4 (right) expression values between TAK-931-sensitive ( $pGI_{50} > 6.67$ ,  $n=82$ ) and TAK-931-resistant ( $pGI_{50} < 6.67$ ,  $n=164$ ) cell lines are shown. The red lines indicate mean  $pGI_{50}$  values in each group. Statistical analyses were performed using Student's *t*-tests. Differences were considered significant at  $p < 0.05$ . n.s., not significant. (G) Effect of baseline expression of CDC7, DBF4, and pMCM2 between sensitive and insensitive cancer cell lines. Seven cancer cell lines were used to evaluate the baseline

expression of CDC7, DBF4, and pMCM2. GAPDH was used for loading controls. (H) Dot plots of TAK-931 GI<sub>50</sub> values in mutant and wildtype cell lines with RAS, TP53, PTEN, RB1, and BRAF mutations. Red lines indicate mean pGI50 values in each group. Sequence data in the CCLE database were used. Statistical analysis was performed using Student's t-tests.

A

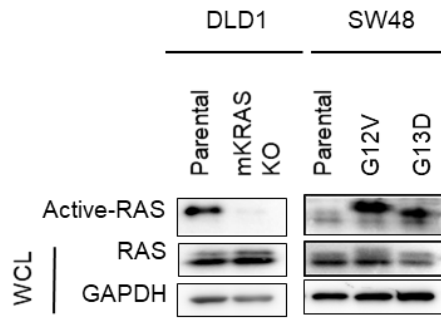

B

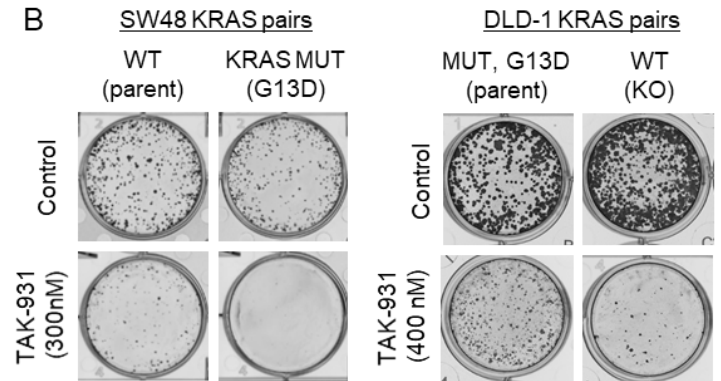

C

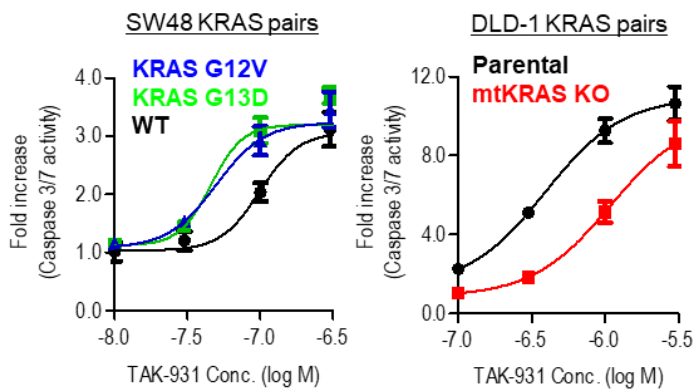

D

| Drugs        | Mechanism               | Cell Line Numbers | Median IC50 Values $\pm$ SEM |
|--------------|-------------------------|-------------------|------------------------------|
| Cisplatin    | platinum compound       | 228               | 4.92 $\pm$ 0.03              |
| Carboplatin  | platinum compound       | 206               | 4.51 $\pm$ 0.05              |
| Oxaliplatin  | platinum compound       | 232               | 5.78 $\pm$ 0.04              |
| Gemcitabine  | antimetabolite          | 224               | 7.90 $\pm$ 0.03              |
| Methotrexate | antimetabolite          | 156               | 7.45 $\pm$ 0.04              |
| SN-38        | topoisomerase inhibitor | 228               | 8.42 $\pm$ 0.05              |
| Doxorubicin  | topoisomerase inhibitor | 203               | 7.45 $\pm$ 0.04              |
| Paclitaxel   | tubulin binder          | 187               | 8.49 $\pm$ 0.04              |

E

|              | TAK-931 | Doxorubicin | Oxaliplatin | SN-38 | Carboplatin | Paclitaxel | Cisplatin | Gemcitabine | Methotrexate |
|--------------|---------|-------------|-------------|-------|-------------|------------|-----------|-------------|--------------|
| TAK-931      | -       | 0.51        | 0.47        | 0.36  | 0.35        | 0.33       | 0.32      | 0.29        | 0.28         |
| Doxorubicin  | 0.51    | -           | 0.56        | 0.53  | 0.45        | 0.65       | 0.50      | 0.36        | 0.37         |
| Oxaliplatin  | 0.47    | 0.56        | -           | 0.45  | 0.46        | 0.33       | 0.46      | 0.22        | 0.41         |
| SN-38        | 0.36    | 0.53        | 0.45        | -     | 0.41        | 0.35       | 0.41      | 0.28        | 0.38         |
| Carboplatin  | 0.35    | 0.45        | 0.46        | 0.41  | -           | 0.21       | 0.72      | 0.34        | 0.30         |
| Paclitaxel   | 0.33    | 0.65        | 0.33        | 0.35  | 0.21        | -          | 0.28      | 0.13        | 0.15         |
| Cisplatin    | 0.32    | 0.50        | 0.46        | 0.41  | 0.72        | 0.28       | -         | 0.45        | 0.37         |
| Gemcitabine  | 0.29    | 0.36        | 0.22        | 0.28  | 0.34        | 0.13       | 0.45      | -           | 0.20         |
| Methotrexate | 0.28    | 0.37        | 0.41        | 0.38  | 0.30        | 0.15       | 0.37      | 0.20        | -            |

F

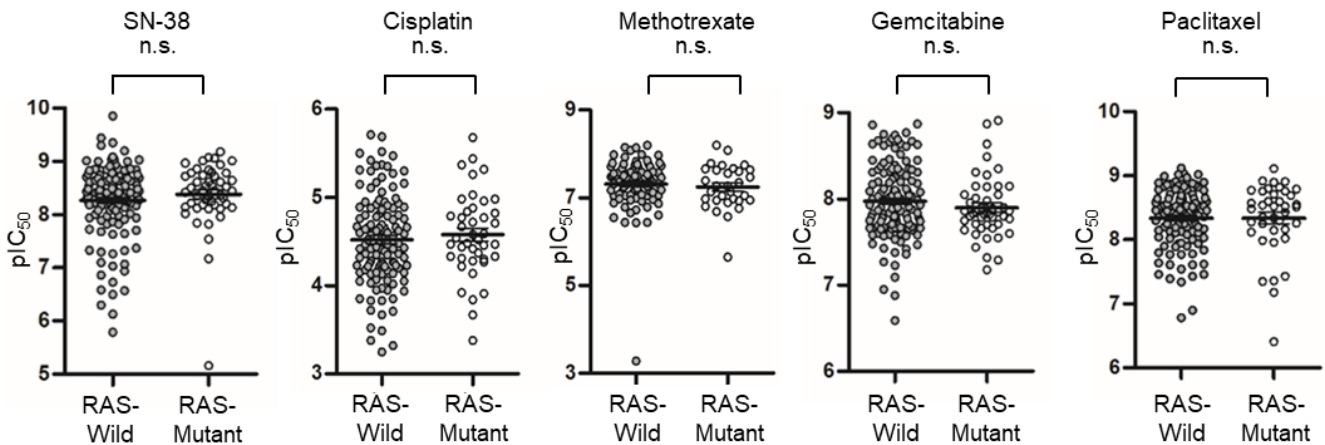

**Fig. S5. Effect of KRAS mutation on TAK-931 antiproliferative activity, showing unique antiproliferative spectrum in cancer cells.** (A) Active RAS was significantly increased in both DLD1-based and SW48-based isogenic cell lines of KRAS mutations. Active RAS was pulled down by GST-fusion protein of the Ras-binding domain (RBD) of Raf1, and then detected by immunoblotting with anti-RAS antibody. RAS and GAPDH in whole cell lysate (WCL) were used for loading controls. (B) Colony formation assays in *KRAS*-mutant or *KRAS*-wildtype cells with or without TAK-931 treatment. SW48-based (left) and DLD1-based (right) isogenic cell line pairs were used. Representative images of crystal violet staining are shown. (C) Effect of *KRAS* mutation on caspase-3/7 induction by TAK-931 treatment. SW48-based (left) and DLD1-based (right) isogenic cell line pairs were treated with TAK-931 at the indicated concentrations for 24 h. Fold increases in caspase-3/7 activity were calculated with chemiluminescence assay and compared with the chemiluminescence value of 0 nM TAK-931 treatment in each cell. (D) Summary of GI<sub>50</sub> values of the following chemotherapeutic drugs in various cancer cell lines: cisplatin, carboplatin, oxaliplatin, gemcitabine, methotrexate, SN-38, doxorubicin, and paclitaxel. (E) Summary of correlation coefficient (R) of the GI<sub>50</sub> values of TAK-931 and the GI<sub>50</sub> values of the indicated chemotherapeutic drugs. Red, yellow, and green indicate  $R > 0.7$ ,  $0.7 \geq R > 0.4$ , and  $R \leq 0.4$ , respectively. (F) Dot plots of GI<sub>50</sub> values in *RAS*-mutant and -wildtype cell lines for SN-38, carboplatin, doxorubicin, gemcitabine, and paclitaxel. Sequence data in the CCLE database were used. Statistical analyses were performed using Student's t-tests for cisplatin, and the Wilcoxon-Mann-Whitney test for SN-38, methotrexate, gemcitabine, and paclitaxel.

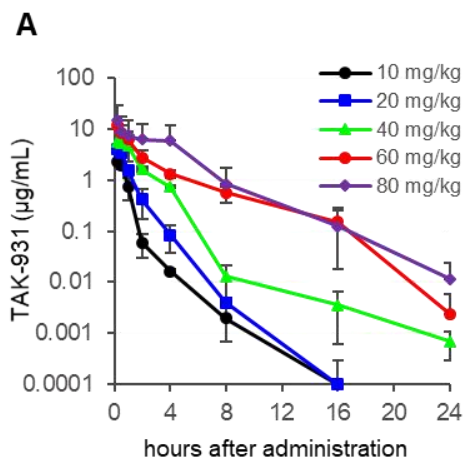

**B**

| Dose<br>(mg/kg) | Plasma      |                              |            |                                                           | Tumor       |                             |            |                                                          |
|-----------------|-------------|------------------------------|------------|-----------------------------------------------------------|-------------|-----------------------------|------------|----------------------------------------------------------|
|                 | Tmax<br>(h) | Cmax<br>( $\mu\text{g/mL}$ ) | MRT<br>(h) | AUC <sub>0-72h</sub><br>( $\mu\text{g}\cdot\text{h/mL}$ ) | Tmax<br>(h) | Cmax<br>( $\mu\text{g/g}$ ) | MRT<br>(h) | AUC <sub>0-72h</sub><br>( $\mu\text{g}\cdot\text{h/g}$ ) |
| 10              | 0.25        | 2.3383                       | 0.77       | 2.0293                                                    | 0.25        | 1.3771                      | 1.79       | 2.0119                                                   |
| 20              | 0.25        | 4.0097                       | 1.04       | 4.2747                                                    | 0.50        | 2.2451                      | 2.30       | 4.3140                                                   |
| 40              | 0.25        | 5.6971                       | 1.76       | 11.6569                                                   | 0.50        | 3.9779                      | 3.72       | 10.6385                                                  |
| 60              | 0.25        | 11.3771                      | 3.34       | 23.2798                                                   | 0.50        | 5.3187                      | 4.00       | 18.4444                                                  |
| 80              | 0.25        | 14.6468                      | 3.47       | 45.3914                                                   | 4.00        | 5.1722                      | 6.86       | 44.3332                                                  |

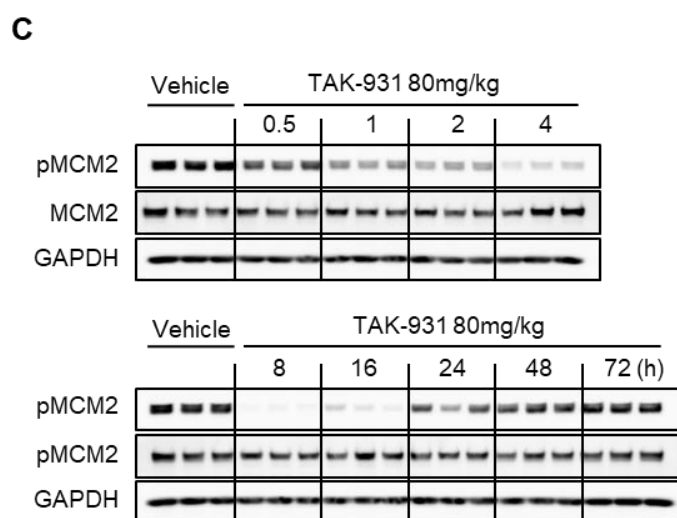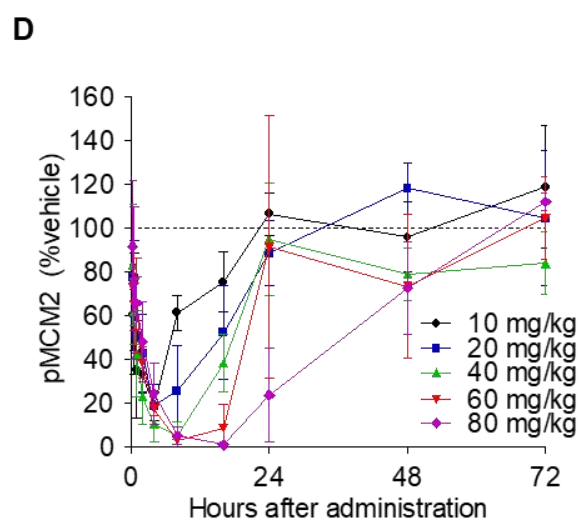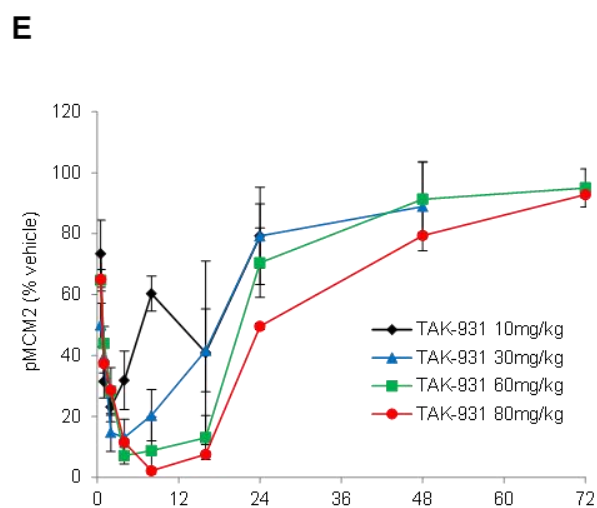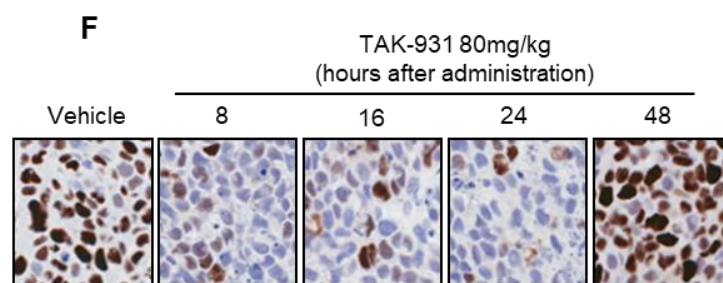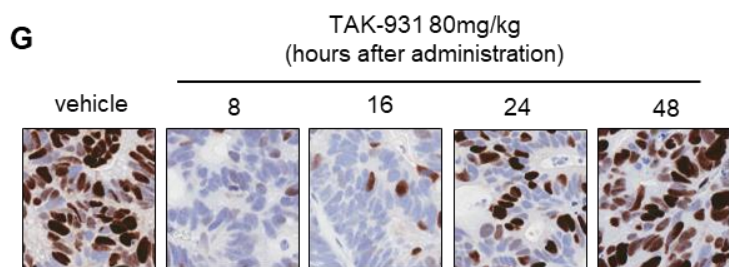

**Fig. S6. PK/PD/efficacy study of TAK-931 in tumor xenograft mouse model.** (A) Time- and dose-dependent plasma PK of TAK-931. Plasma was collected to measure drug concentrations at the indicated time points after TAK-931 oral administration. Black, blue, green, red, and purple lines indicate 10, 20, 40, 60, and 80 mg/kg doses. (B) Summary of TAK-931 PK profile in plasma and tumor. COLO205-xenografted nude mice were orally administered TAK-931 at the indicated doses. Time at peak serum concentration ( $T_{max}$ ), peak serum concentration ( $C_{max}$ ), mean resident time (MRT), and area under the curve from 0–72 h ( $AUC_{0-72h}$ ) are shown. (C) Expression of pMCM2 in SW948 xenografts at the indicated time points after oral administration of TAK-931 at a dose of 80 mg/kg. MCM2 and GAPDH were used as controls. (D) Time- and dose-dependent PD of TAK-931 in COLO205 xenografts. COLO205 xenografts were collected to measure pMCM2 expression at the indicated time points after TAK-931 oral administration. Black, blue, green, orange, and red lines indicate 10, 20, 40, 60, and 80 mg/kg doses. The pHH3 intensity was quantified using immunoblotting, and normalized to the intensity of vehicle control. (E) Time- and dose-dependent PD of TAK-931. SW948 xenografts were collected to measure pMCM2 expression at the indicated time points after TAK-931 oral administration. Black, blue, green, and red lines indicate 10, 30, 60, and 80 mg/kg doses, respectively. pHH3 intensity was quantified using immunoblotting, and normalized to the intensity of vehicle control. (F) (G) Immunohistochemistry of pMCM2 in the tumor sections from COLO205 (F) and SW948 (G) xenograft nude mice at the indicated time points after oral administration of TAK-931 at 80 mg/kg.



**A**

| Regimen       | T/C (%) | BWC (%) | Death |
|---------------|---------|---------|-------|
| Vehicle       | -       | +5.6    | 0/5   |
| 10 mg/kg, bid | 63      | +2.2    | 0/5   |
| 20 mg/kg, bid | 67      | -0.5    | 0/5   |
| 40 mg/kg, bid | 9       | -0.1    | 0/5   |
| 60 mg/kg, bid | -17     | -10.2   | 0/5   |

**B**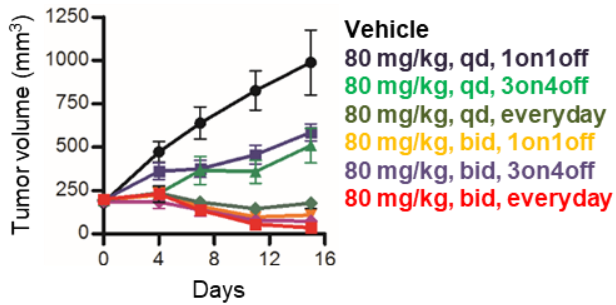**C**

| Regimen                           | T/C (%) | BWC (%) | Death |
|-----------------------------------|---------|---------|-------|
| Vehicle                           | -       | -2.6    | 0/5   |
| 80 mg/kg, qd, 1 day on/1 day off  | 48      | +4.7    | 0/5   |
| 80 mg/kg, qd, 3 day on/3 day off  | 39      | +6.1    | 0/5   |
| 80 mg/kg, bid, 1 day on/1 day off | -11     | +4.0    | 0/5   |
| 80 mg/kg, bid, 3 day on/4 day off | -14     | +6.5    | 0/5   |
| 80 mg/kg, qd, Everyday            | -3      | -4.2    | 0/5   |
| 60 mg/kg, bid, Everyday           | -20     | -13.9   | 0/5   |

**D**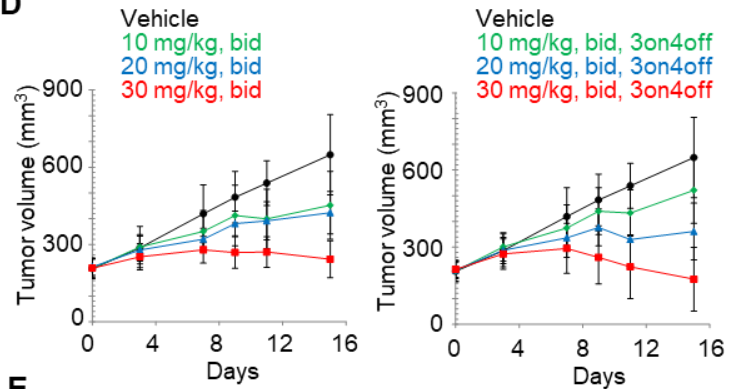**E**

| Regimen                     | T/C (%) | BWC (%) | Death      |
|-----------------------------|---------|---------|------------|
| Vehicle                     | -       | -11.5   | 0/8        |
| 10 mg/kg, bid, Day1-14      | 55      | -13.6   | 0/8        |
| 20 mg/kg, bid, Day1-14      | 47      | -18.6   | 0/8        |
| 30 mg/kg, bid, Day1-14      | 8       | -15.2   | 1/8 (Day9) |
| 20 mg/kg, bid, Day1-3, 8-10 | 71      | -13.4   | 0/8        |
| 40 mg/kg, bid, Day1-3, 8-10 | 34      | -12.9   | 0/8        |
| 60 mg/kg, bid, Day1-3, 8-10 | -9      | -11.6   | 0/8        |

**F**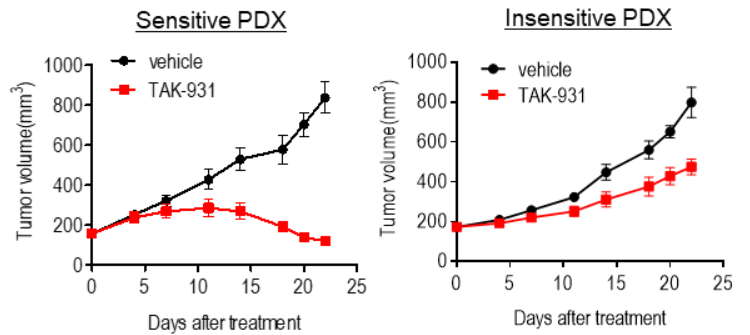**G**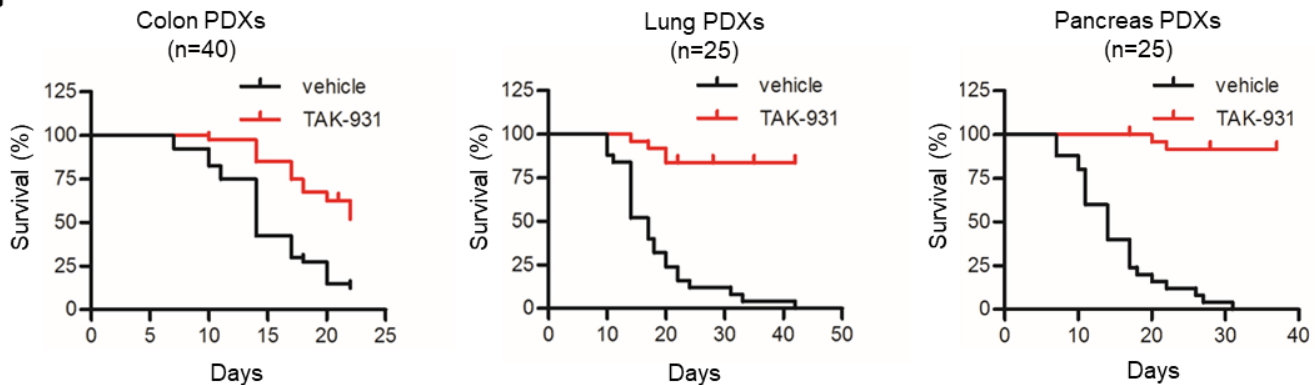

**Fig. S7. Antitumor efficacy of TAK-931 in tumor xenograft mouse model.** (A, B, C) Summary of %T/C and BWC in the COLO205 xenograft nude mouse model. COLO205-xenografted nude mice were orally administered TAK-931 at the indicated dose regimens, either continuously (A) or intermittently (B) (C) (n=5; day 15). (D) Antitumor efficacy of TAK-931 in the SW948 xenograft nude mouse model. SW948 xenografted nude mice were orally administered TAK-931 at the indicated dose regimens, either continuously (left) or intermittently (right). Efficacy data are plotted as mean tumor volumes ( $\text{mm}^3 \pm \text{SEM}$ ; n = 5). (E) Summary of %T/C and BWC on day 15. (F) Representative results of the efficacy study for sensitive (left) and resistant (right) PDXs. Black and red lines indicate vehicle and TAK-931 treatment, respectively. The efficacy data are plotted as mean tumor volumes ( $\text{mm}^3 \pm \text{SEM}$ ; n = 3). (G) Kaplan-Meier survival curve in 93 PDX models. Black and red lines indicate vehicle- and TAK-931-treated groups, respectively. Xenografted mice were orally administered TAK-931 at 60 mg/kg, twice daily, 3-days ON/4-days OFF, for the indicated cycles. Three mice were treated with vehicle or TAK-931 for each model.

A

| GENESYMBOLS | Correlation |
|-------------|-------------|
| ARHGAP15    | -0.30       |
| CASR        | 0.35        |
| DBF4        | 0.37        |
| DCAF7       | 0.31        |
| FBXO5       | 0.33        |
| KDM4A       | 0.30        |
| KIF5A       | 0.32        |
| KRAS        | 0.30        |
| NEUROD2     | -0.30       |
| NOTCH3      | 0.31        |
| PVRL3       | 0.37        |
| SEC13       | 0.30        |
| SEC62       | 0.30        |
| TCF7        | 0.30        |

B

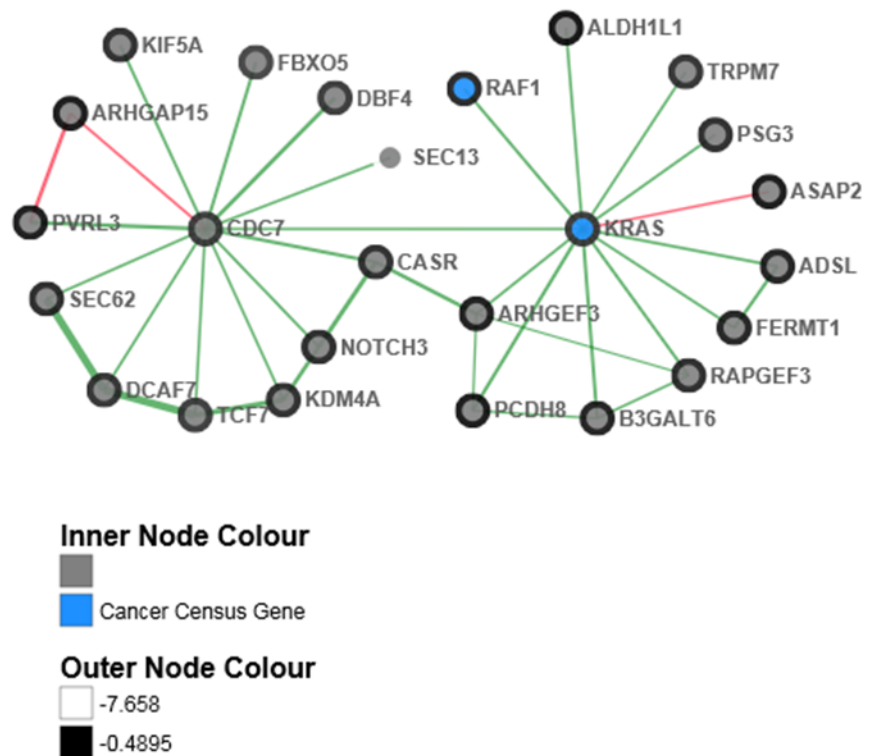

**Fig. S8. Pathway network between CDC7 and KRAS knockdown.** The network analysis of CDC7 and KRAS knockdown has been performed previously (45) <<<https://oncologynibr.shinyapps.io/drive/>>>. (A) The list of genes correlated with CDC7 knockdown effects is shown. The genes of which knockdown effects are correlated with CDC7 knockdown effects at  $> |0.3|$  are listed. (B) The pathway network of CDC7 and KRAS knockdown is shown. The network analysis was performed using CDC7 and KRAS as seed genes. The neighborhood correlations for CDC7 and KRAS are shown with positive correlations in green and negative correlations in red. The thickness of the lines between two genes represents the strength of the correlation.

**Table S1. Phosphorylation sites modulated after 4 and 24 hours of TAK-931 treatment in COLO205 cells.** Protein and gene names, ratios of phosphorylation changes, and amino acid positions are shown.

| 4 hours treatment                                          |            |       |            |                |
|------------------------------------------------------------|------------|-------|------------|----------------|
| Protein Names                                              | Gene Names | Ratio | Amino Acid | Positions      |
| MAX gene-associated protein                                | MGA        | 0.20  | S          | 2712           |
| Alpha-enolase                                              | ENO        | 0.31  | S          | 353            |
| 24 hours Treatment                                         |            |       |            |                |
| Protein Names                                              | Gene Names | Ratio | Amino Acid | Positions      |
| Cell division control protein 6 homolog                    | CDC6       | 2.34  | S          | 45             |
| Cell division control protein 6 homolog                    | CDC6       | 2.29  | S          | 106            |
| Fizzy-related protein homolog                              | FZR1       | 5.24  | S          | 138            |
| MAX gene-associated protein                                | MGA        | 0.21  | S          | 2712           |
| Nucleosome assembly protein 1-like 4                       | NAP1L4     | 0.27  | S          | 12             |
| Cell division cycle protein 20 homolog                     | CDC20      | 2.87  | T          | 70             |
| Cell division cycle protein 20 homolog                     | CDC20      | 3.48  | S          | 41             |
| Holliday junction recognition protein                      | HJURP      | 2.24  | S          | 448            |
| Inner centromere protein                                   | INCENP     | 3.42  | S          | 263            |
| Inner centromere protein                                   | INCENP     | 3.42  | S          | 275            |
| Kinesin-like protein KIF11                                 | KIF11      | 2.43  | T          | 926            |
| Telomere-associated protein RIF1                           | RIF1       | 2.25  | S          | 2196           |
| Telomere-associated protein RIF1                           | RIF1       | 2.28  | S          | 2172           |
| DNA topoisomerase 2-alpha                                  | TOP2A      | 2.69  | S          | 1294           |
| Rho GTPase-activating protein 11A                          | ARHGAP11A  | 2.64  | S          | 585            |
| ATPase family AAA domain-containing protein 5              | ATAD5      | 2.35  | S          | 44             |
| Coiled-coil domain-containing protein 138                  | CCDC138    | 2.32  | S          | 154            |
| Cell division cycle-associated protein 2                   | CDCA2      | 2.38  | S          | 936            |
| CAP-Gly domain-containing linker protein 1                 | CLIP1      | 2.37  | T          | 287            |
| Disks large-associated protein 5                           | DLGAP5     | 2.71  | S          | 618            |
| Deoxynucleotidyltransferase terminal-interacting protein 2 | DNTTIP2    | 2.54  | S          | 434            |
| Eukaryotic translation initiation factor 5B                | EIF5B      | 2.64  | S          | 1168           |
| Band 4.1-like protein 1                                    | EPB41L1    | 3.44  | S          | 544;470        |
| Band 4.1-like protein 1                                    | EPB41L1    | 3.44  | S          | 501            |
| Band 4.1-like protein 1                                    | EPB41L1    | 2.37  | S          | 540;466        |
| Band 4.1-like protein 1                                    | EPB41L1    | 2.37  | S          | 497            |
| Eyes absent homolog 3                                      | EYA3       | 2.33  | T          | 269            |
| Leucine-rich repeat-containing protein 16A                 | LRRC16A    | 2.57  | T          | 1228           |
| Antigen KI-67                                              | MKI67      | 1.96  | T          | 1261;901       |
| Nucleolar and coiled-body phosphoprotein 1                 | NOLC1      | 0.31  | T          | 620            |
| Nucleolar and coiled-body phosphoprotein 1                 | NOLC1      | 0.31  | T          | 617            |
| Nuclear pore complex protein Nup214                        | NUP214     | 2.29  | S          | 1963;1952;1953 |
| DNA polymerase alpha subunit b                             | POLA2      | 2.54  | S          | 141            |
| E3 SUMO-protein ligase RanBP2                              | RANBP2     | 2.59  | T          | 1412           |
| E3 SUMO-protein ligase RanBP2                              | RANBP2     | 2.09  | T          | 2613           |
| E3 SUMO-protein ligase RanBP2                              | RANBP2     | 2.61  | T          | 1178;2153;1177 |
| Splicing factor, proline- and glutamine-rich               | SFPQ       | 0.35  | S          | 374            |
| Shugoshin-like 1                                           | SGOL1      | 2.33  | S          | 256            |
| C-Jun-amino-terminal kinase-interacting protein 4          | SPAG9      | 2.42  | S          | 183;183        |
| C-Jun-amino-terminal kinase-interacting protein 4          | SPAG9      | 2.51  | S          | 245            |
| Nucleoprotein TPR                                          | TPR        | 2.32  | S          | 1185           |
| DNA repair protein XRCC1                                   | XRCC1      | 2.40  | S          | 226            |
| DNA repair protein XRCC1                                   | XRCC1      | 2.37  | T          | 257            |
| Uncharacterized protein C6orf132                           | C6orf132   | 2.21  | T          | 661            |
| Protein FAM83B                                             | FAM83B     | 2.32  | T          | 782            |
| Histone H2B type 3-B                                       | HIST3H2BB  | 0.44  | S          | 39;39          |
| Insulin receptor substrate 2                               | IRS2       | 0.25  | S          | 1174           |
| Uncharacterized protein KIAA1522                           | KIAA1522   | 4.97  | S          | 400            |
| PH and SEC7 domain-containing protein 3                    | PSD3       | 2.67  | S          | 1012           |
| Supervillin                                                | SVIL;SVIL  | 2.50  | S          | 694            |

**Table S2. %T/C values of antitumor efficacy studies in colorectal, lung, ovarian, and pancreatic PDXs.**

| Model ID | Tumor Type | TGI (%) | TGI endpoint (Day) | BWC (%) | Model ID | Tumor Type | TGI (%) | TGI endpoint (Day) | BWC (%) |
|----------|------------|---------|--------------------|---------|----------|------------|---------|--------------------|---------|
| CR_1     | Colon      | 80.0    | 22                 | -7.1    | LU_8     | Lung       | 84.7    | 33                 | -6.9    |
| CR_2     | Colon      | 97.6    | 21                 | -8.7    | LU_9     | Lung       | 81.9    | 42                 | -5.1    |
| CR_3     | Colon      | 89.3    | 22                 | -3.5    | LU_10    | Lung       | 99.1    | 22                 | -6.4    |
| CR_4     | Colon      | 66.4    | 22                 | -12.3   | LU_11    | Lung       | 97.8    | 17                 | -8.2    |
| CR_5     | Colon      | 85.6    | 22                 | -9.1    | LU_12    | Lung       | 95.4    | 22                 | -8.5    |
| CR_6     | Colon      | 79.7    | 22                 | -11.7   | LU_13    | Lung       | 79.8    | 26                 | -9.2    |
| CR_7     | Colon      | 70.8    | 22                 | -5.0    | LU_14    | Lung       | 78.9    | 22                 | -8.0    |
| CR_8     | Colon      | 64.0    | 22                 | -18.6   | LU_15    | Lung       | 78.1    | 22                 | -5.9    |
| CR_9     | Colon      | 59.7    | 22                 | -14.3   | LU_16    | Lung       | 72.4    | 22                 | -9.0    |
| CR_10    | Colon      | 48.4    | 22                 | -9.5    | LU_17    | Lung       | 73.3    | 22                 | -7.0    |
| CR_11    | Colon      | 53.5    | 22                 | -4.7    | LU_18    | Lung       | 76.8    | 20                 | -4.5    |
| CR_12    | Colon      | 54.6    | 22                 | -11.9   | LU_19    | Lung       | 67.9    | 22                 | -2.8    |
| CR_13    | Colon      | 38.7    | 22                 | -6.4    | LU_20    | Lung       | 54.0    | 22                 | -3.1    |
| CR_14    | Colon      | 48.3    | 22                 | -0.1    | LU_21    | Lung       | 59.0    | 22                 | -5.8    |
| CR_15    | Colon      | 54.5    | 22                 | -6.7    | LU_22    | Lung       | 53.1    | 22                 | -6.9    |
| CR_16    | Colon      | 50.2    | 22                 | -7.2    | LU_23    | Lung       | 55.3    | 22                 | -4.3    |
| CR_17    | Colon      | 54.6    | 22                 | -15.4   | LU_24    | Lung       | 50.8    | 22                 | -6.9    |
| CR_18    | Colon      | 50.1    | 22                 | -13.9   | LU_25    | Lung       | 30.8    | 22                 | -3.7    |
| CR_19    | Colon      | 51.1    | 22                 | -15.0   | OV_1     | Ovary      | 71.7    | 22                 | -7.3    |
| CR_20    | Colon      | 38.6    | 22                 | -9.2    | OV_2     | Ovary      | 57.4    | 22                 | -4.2    |
| CR_21    | Colon      | 45.1    | 22                 | -13.9   | OV_3     | Ovary      | 56.5    | 22                 | -14.9   |
| CR_22    | Colon      | 35.4    | 22                 | -10.9   | PA_1     | Pancreas   | 98.5    | 22                 | -6.0    |
| CR_23    | Colon      | 49.5    | 22                 | -15.4   | PA_2     | Pancreas   | 82.6    | 22                 | -6.8    |
| CR_24    | Colon      | 41.6    | 22                 | -7.8    | PA_3     | Pancreas   | 84.2    | 22                 | -17.5   |
| CR_25    | Colon      | 42.3    | 22                 | -5.2    | PA_4     | Pancreas   | 73.0    | 22                 | -5.3    |
| CR_26    | Colon      | 42.5    | 22                 | -3.7    | PA_5     | Pancreas   | 66.2    | 22                 | -4.1    |
| CR_27    | Colon      | 38.3    | 22                 | -6.3    | PA_6     | Pancreas   | 66.5    | 22                 | -12.5   |
| CR_28    | Colon      | 38.7    | 22                 | -8.5    | PA_7     | Pancreas   | 54.0    | 22                 | -8.2    |
| CR_29    | Colon      | 36.1    | 22                 | -5.1    | PA_8     | Pancreas   | 56.5    | 22                 | -6.5    |
| CR_30    | Colon      | 33.9    | 22                 | -11.9   | PA_9     | Pancreas   | 52.2    | 22                 | -15.3   |
| CR_31    | Colon      | 35.2    | 22                 | -14.5   | PA_10    | Pancreas   | 41.7    | 22                 | -17.4   |
| CR_32    | Colon      | 28.4    | 22                 | 0.4     | PA_11    | Pancreas   | 23.8    | 22                 | -9.5    |
| CR_33    | Colon      | 17.1    | 22                 | -6.6    | PA_12    | Pancreas   | 85.8    | 22                 | -15.5   |
| CR_34    | Colon      | 21.9    | 22                 | -1.1    | PA_13    | Pancreas   | 89.0    | 22                 | -8.0    |
| CR_35    | Colon      | 15.7    | 22                 | -5.9    | PA_14    | Pancreas   | 79.2    | 28                 | -2.4    |
| CR_36    | Colon      | 18.6    | 22                 | -12.8   | PA_15    | Pancreas   | 81.7    | 22                 | -2.0    |
| CR_37    | Colon      | 15.3    | 22                 | -11.9   | PA_16    | Pancreas   | 86.7    | 22                 | -8.1    |
| CR_38    | Colon      | 10.2    | 22                 | -3.9    | PA_17    | Pancreas   | 81.3    | 22                 | -5.8    |
| CR_39    | Colon      | 3.8     | 22                 | -18.6   | PA_18    | Pancreas   | 73.3    | 22                 | -5.4    |
| CR_40    | Colon      | 2.9     | 22                 | -13.3   | PA_19    | Pancreas   | 64.6    | 37                 | -1.8    |
| LU_1     | Lung       | 82.8    | 22                 | -11.6   | PA_20    | Pancreas   | 54.6    | 28                 | -6.3    |
| LU_2     | Lung       | 70.0    | 22                 | -9.2    | PA_21    | Pancreas   | 67.7    | 22                 | -6.6    |
| LU_3     | Lung       | 43.9    | 22                 | 0.0     | PA_22    | Pancreas   | 73.3    | 17                 | -5.7    |
| LU_4     | Lung       | 21.5    | 22                 | -10.4   | PA_23    | Pancreas   | 70.1    | 22                 | -4.7    |
| LU_5     | Lung       | 94.4    | 35                 | -10.2   | PA_24    | Pancreas   | 55.1    | 22                 | -3.1    |
| LU_6     | Lung       | 90.2    | 22                 | -5.9    | PA_25    | Pancreas   | 40.5    | 22                 | -10.8   |
| LU_7     | Lung       | 91.4    | 22                 | -4.8    |          |            |         |                    |         |
